# Supplementary material for: The role of smoke from cooking indoors over an open flame and parental smoking on the risk of cleft lip and palate: A case- control study in 7 low-resource countries
Source: PubMed Central journal article supplement (PMC7568926; doi:10.7189/jogh.10.020410), 2020-12

**Table S1.** All Sites Used for Case and Control Collection

| Country                      | City                          | Site                                         |
|------------------------------|-------------------------------|----------------------------------------------|
| Democratic Republic of Congo | Kinshasa                      | Operation Smile Democratic Republic of Congo |
|                              |                               | Council National de l'Orde des Medecins      |
|                              |                               | Clinique Ngaliema                            |
|                              |                               | Kinshasa General                             |
|                              |                               | Roi Baudouin                                 |
|                              |                               | Maternite Kingasani                          |
|                              |                               | El Rapha Clinic                              |
|                              |                               | Kitambo                                      |
| Honduras                     | Choluteca                     | Hospital Regional Del Sur                    |
|                              | Comayagua                     | Hospital Santa Teresa                        |
|                              | Santa Rosa de Copan           | Hospital Regional de Occidente               |
|                              | Tegucigalpa                   | Operacion Sonrisa Honduras                   |
|                              |                               | Hospital San Felipe                          |
| Madagascar                   | Antananarivo                  | Operation Smile Madagascar                   |
|                              |                               | Joseph Ravoahangy Andrianavalona Hospital    |
|                              | Antsirabe                     | Vakinankaratra Regional Center Hospital      |
| Morocco                      | Oujda                         | Hospital Al Farabi                           |
|                              | Marrakesh                     | Ibn Tofail Hospital                          |
|                              | Tiznit                        | Hospital Hasan I                             |
| Nicaragua                    | Managua                       | Operacion Sonrisa Nicaragua                  |
|                              |                               | Hospital Aleman Nicaraguanese                |
|                              |                               | Hospital Berta Calderon                      |
| Philippines                  | Bacolod                       | Our Lady of Mercy Hospital                   |
|                              |                               | Adventist Miller Hospital                    |
|                              | Cauayan City                  | Cauayan District Hospital                    |
|                              |                               | Isabela United Doctors Medical Center        |
|                              | Cavite                        | General Emilio Aguinaldo Memorial Hospital   |
|                              |                               | Pakamutan ng Dasmaringas                     |
|                              |                               | St. Paul Hospital                            |
|                              | Cebu                          | Mariquita Young Foundation                   |
|                              |                               | Paanakan Se Mandaue (Mandaue)                |
|                              |                               | St. Anthony's Birthing Clinic                |
|                              |                               | Municipal Health Office of Consolacion       |
|                              |                               | Daisy's Birthing Clinic                      |
|                              |                               | University of Cebu Medical Center            |
|                              | Davao City                    | Brokenshire Hospital                         |
|                              |                               | Mindanao Cleft Center                        |
|                              | General Santos                | General Santos District Hospital             |
|                              | Iloilo                        | Qualimed Hospital                            |
| CFC Birthing Clinic          |                               |                                              |
| Pampanga                     | Ricardo Rodriguez Hospital    |                                              |
|                              | Diosdado Macapagal Hospital   |                                              |
|                              | Jesus A Datu Medical Center   |                                              |
| Vietnam                      | An Giang                      | An Giang General Hospital                    |
|                              | Dak Lak                       | Dak Lak District Hospital                    |
|                              |                               | Vietnam Cuba Friendship Hospital             |
|                              | Hanoi                         | Operation Smile Vietnam                      |
|                              |                               | Phu San HN (Hanoi Maternity Clinic)          |
|                              | Ho Chi Minh City              | HCMC University Medical Center               |
|                              |                               | Thu Duc District Hospital                    |
| Hue                          | Hue University Medical Center |                                              |

Quang Ngai

Quang Ngai Hospital

**Table S2.** Case and Control Breakdown by Year for All Countries

|                    | 2012           |               | 2013           |               | 2014           |                | 2015           |                | 2016           |                | 2017           |                |
|--------------------|----------------|---------------|----------------|---------------|----------------|----------------|----------------|----------------|----------------|----------------|----------------|----------------|
|                    | Control        | Case          | Control        | Case          | Control        | Case           | Control        | Case           | Control        | Case           | Control        | Case           |
|                    | (n=210)        | (n=136)       | (n=248)        | (n=106)       | (n=419)        | (n=532)        | (n=553)        | (n=493)        | (n=412)        | (n=530)        | (n=172)        | (n=340)        |
| Country            |                |               |                |               |                |                |                |                |                |                |                |                |
| <b>Congo</b>       | 117<br>(55.7%) | 50<br>(36.8%) | 91<br>(36.7%)  | 33<br>(31.1%) | 0 (0%)         | 0 (0%)         | 74<br>(13.4%)  | 59<br>(12.0%)  | 0 (0%)         | 0 (0%)         | 0 (0%)         | 0 (0%)         |
| <b>Honduras</b>    | 0 (0%)         | 0 (0%)        | 0 (0%)         | 0 (0%)        | 169<br>(40.3%) | 132<br>(24.8%) | 145<br>(26.2%) | 74<br>(15.0%)  | 193<br>(46.8%) | 129<br>(24.3%) | 21<br>(12.2%)  | 54<br>(15.9%)  |
| <b>Madagascar</b>  | 0 (0%)         | 0 (0%)        | 0 (0%)         | 0 (0%)        | 0 (0%)         | 0 (0%)         | 0 (0%)         | 0 (0%)         | 85<br>(20.6%)  | 128<br>(24.2%) | 0 (0%)         | 0 (0%)         |
| <b>Morocco</b>     | 0 (0%)         | 0 (0%)        | 0 (0%)         | 0 (0%)        | 23<br>(5.5%)   | 45<br>(8.5%)   | 30<br>(5.4%)   | 39<br>(7.9%)   | 16<br>(3.9%)   | 27<br>(5.1%)   | 0 (0%)         | 0 (0%)         |
| <b>Nicaragua</b>   | 0 (0%)         | 0 (0%)        | 0 (0%)         | 0 (0%)        | 0 (0%)         | 0 (0%)         | 0 (0%)         | 0 (0%)         | 0 (0%)         | 0 (0%)         | 47<br>(27.3%)  | 124<br>(36.5%) |
| <b>Philippines</b> | 93<br>(44.3%)  | 50<br>(36.8%) | 0 (0%)         | 0 (0%)        | 206<br>(49.2%) | 181<br>(34.0%) | 38<br>(6.9%)   | 157<br>(31.8%) | 13<br>(3.2%)   | 110<br>(20.8%) | 3 (1.7%)       | 75<br>(22.1%)  |
| <b>Vietnam</b>     | 0 (0%)         | 36<br>(26.5%) | 157<br>(63.3%) | 73<br>(68.9%) | 21<br>(5.0%)   | 174<br>(32.7%) | 266<br>(48.1%) | 164<br>(33.3%) | 105<br>(25.5%) | 136<br>(25.7%) | 101<br>(58.7%) | 87<br>(25.6%)  |

**Table S2.** Adjusted Odd's Ratios (OR) of Smoke Related Factors and Isolated Cleft Palate in all countries (N= 2320)

|                                           | Model 1* |              |         | Model 2** |              |         | Model 3*** |              |         |
|-------------------------------------------|----------|--------------|---------|-----------|--------------|---------|------------|--------------|---------|
|                                           | OR       | 95% CI       | p-value | OR        | 95% CI       | p-value | OR         | 95% CI       | p-value |
| Cooking indoors over open flame           | 1.65     | (1.22, 2.23) | 0.001   | 1.33      | (0.95, 1.85) | 0.10    | 1.28       | (0.91, 1.79) | 0.16    |
| Smoking Pre-pregnancy- Mother             | 0.75     | (0.21, 2.10) | 0.61    | 0.82      | (0.19, 2.52) | 0.76    | NA         | NA           | NA      |
| Smoking during pregnancy- Mother          | NA       | NA           | NA      | NA        | NA           | NA      | 1.15       | (0.26, 3.75) | 0.98    |
| Smoking- Father                           | 1.20     | (0.90, 1.60) | 0.22    | 1.17      | (0.86, 1.59) | 0.31    | 1.35       | (0.99, 2.00) | 0.14    |
| Smoking in the household during pregnancy | 0.99     | (0.74, 1.34) | 0.97    | 0.97      | (0.71, 1.32) | 0.84    | 0.80       | (0.53, 1.19) | 0.27    |

\*Model 1-- Adjusted for country, maternal age, mother and father education (primary or less/ secondary or more), family history of cleft

\*\*Model 2-- Additionally adjusted for rural/ urban home and alcohol consumption during pregnancy

\*\*\*Model 3-- Mutually adjusted for all smoke variables and Model 2 covariates

Figure S1. Cooking Indoors Over an Open Flame- Odds Ratio and 95% CI Excluding each Country (CL+/-P ONLY)

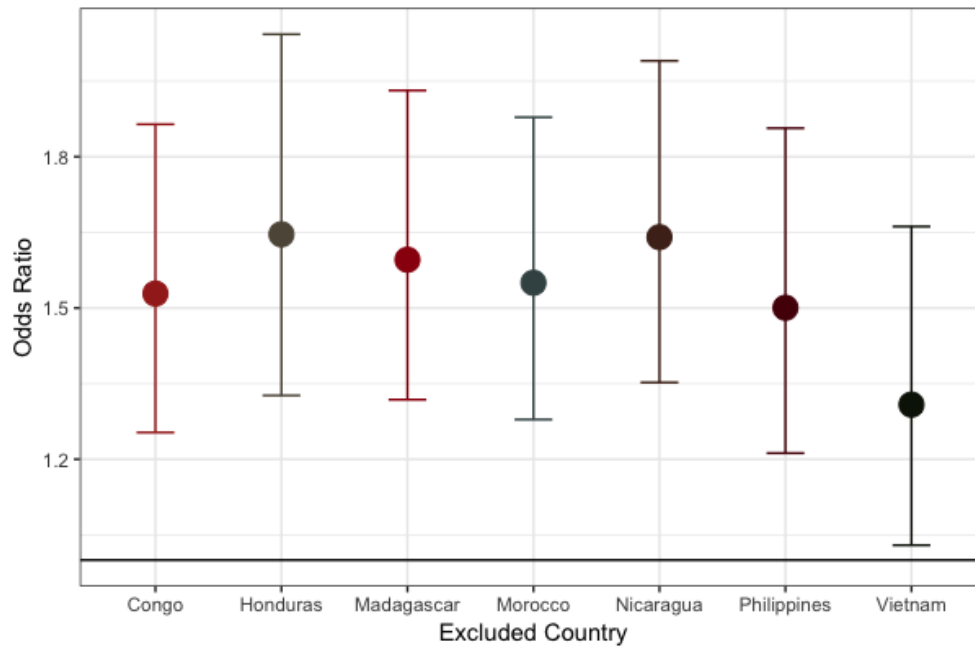

Figure S2. Cooking Indoors Over an Open Flame- Odds Ratio and 95% CI By Country (CL+/-P ONLY)

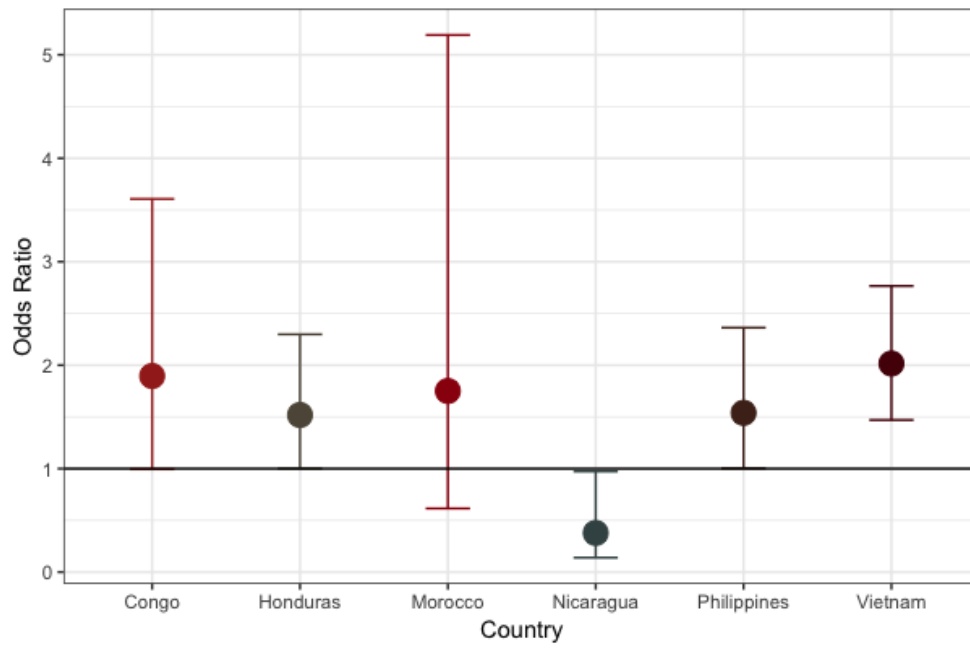

Figure S3. Cooking Indoors Over an Open Flame- Odds Ratio and 95% CI Excluding each Country (iCP ONLY)

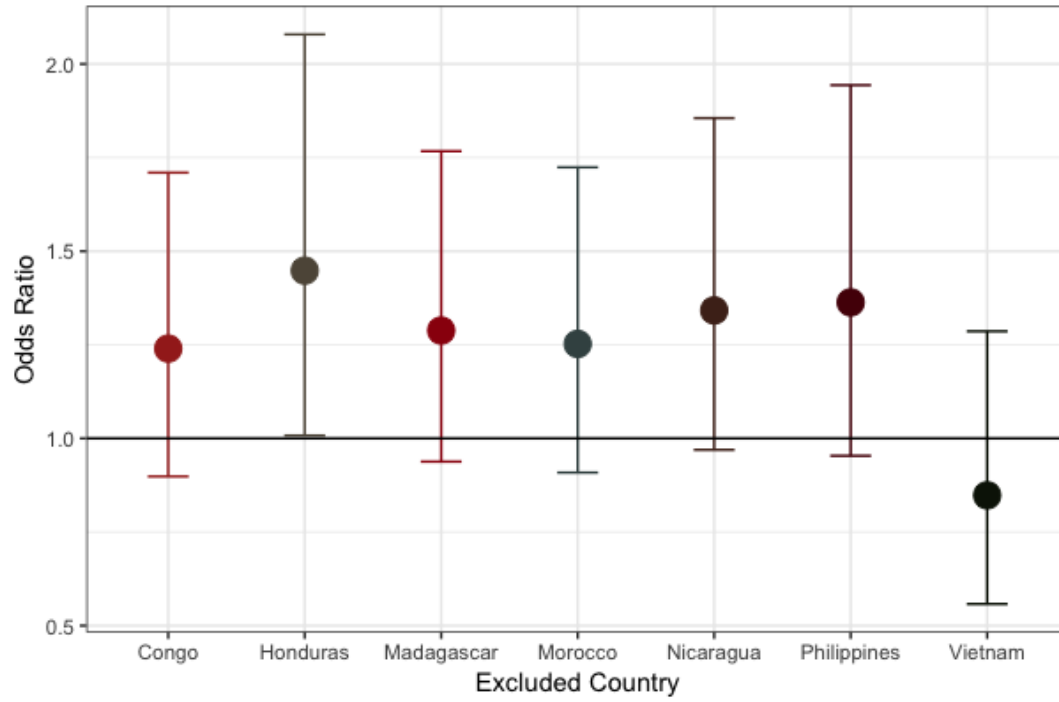

Figure S1. Cooking Indoors Over an Open Flame- Odds Ratio and 95% CI By Country (iCP ONLY)

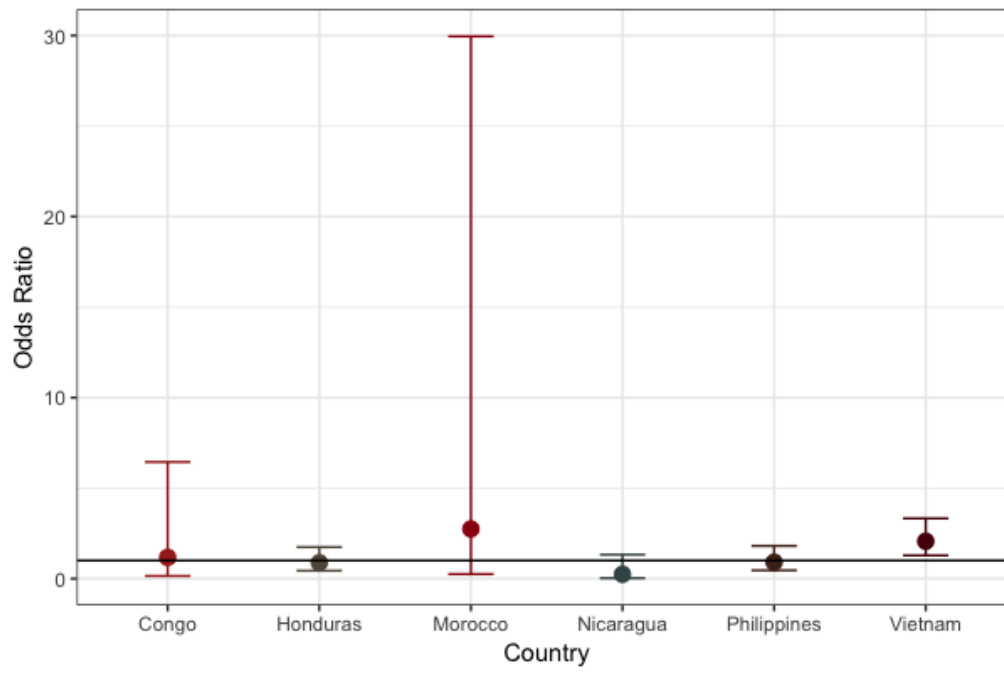

Supplement: jogh-10-020410-s001.pdf [file jogh-10-020410-s001.pdf]
